# Supplementary material for: The Influence of Recreational Substance Use in TMS Research
Source: PubMed Central journal article supplement (PMC7603156; doi:10.3390/brainsci10100751), 2020-10-18
Supplement: brainsci-10-00751-s001.pdf [file brainsci-10-00751-s001.pdf]

**Table S1.** TMS studies investigating the effects of recreational substance use.

| Substance      | Study                     | Sample                                                                 | Study Design | Target Muscle | Dose Administered/Use History                                                                                                                                | Detection and/or Levels in the Body                                                                             |
|----------------|---------------------------|------------------------------------------------------------------------|--------------|---------------|--------------------------------------------------------------------------------------------------------------------------------------------------------------|-----------------------------------------------------------------------------------------------------------------|
| <i>Alcohol</i> | Ziemann et al. [17]       | 6 healthy (4M, 26.8 ± 3.6y)                                            | I            | ADM           | 0.7L wine (12% vol. ethanol)                                                                                                                                 | Mean BAC: 0.73 ± 0.1ml/L                                                                                        |
|                | Ziemann et al. [18]       | 6 healthy (26.3 ± 2.6y)                                                | I            | ADM           | 0.7L wine (12% vol. ethanol)                                                                                                                                 | N/A                                                                                                             |
|                | Conte et al. [19]         | 13 alcoholics (11M, 49 ± 6y), 10 controls (7M, 50 ± 4y)                | I            | FDI           | Alcoholics: 18y of consumption with 13 drinks/day<br>Controls: administered 24g (males) or 12g (females) of ethanol                                          | Alcohol dependents: negative BAC in breath test<br>Controls: 30 ± 6.05mg/dL (males) and 32 ± 6.0mg/dL (females) |
|                | Muralidharan et al. [23]  | 15 high-risk & 15 low-risk for alcohol dependence (all M, 20.5 ± 4.2y) | CS           | OP            | High risk: alcohol-naïve subjects with family history of alcohol dependence<br>Low risk: alcohol-naïve subjects without family history of alcohol dependence | N/A                                                                                                             |
|                | Hoppenbrouwer et al. [20] | 22 healthy (10M, 22.5 ± 0.9y)                                          | I (PC)       | APB           | 300mL solutions of alcohol/orange juice mix until BAC reached 0.5%                                                                                           | BAC of 0.5%                                                                                                     |
|                | Nardone et al. [24]       | 13 AWS (8M, 48.4y), 12 alcoholics (8M, 47.6y), 15 controls (8M, 46.8y) | CS           | FDI           | AWS: diagnosis in accordance to DMS-IV<br>Alcoholics: 13.4 drinks/day for 17y                                                                                | N/A                                                                                                             |
|                | Muralidharan et al. [25]  | 16 high-risk & 12 low-risk for alcohol dependence (12-25y)             | CS           | FDI           | High risk: alcohol-naïve subjects with family history of alcohol dependence<br>Low risk: alcohol-naïve subjects without family history of alcohol dependence | N/A                                                                                                             |
|                | Naim-Feil et al. [26]     | 12 alcoholics in post-detox phase (8M, 40.1                            | CS           | FDI           | Alcoholics: 15 drinks/day for 16y, tested 145 days post                                                                                                      | N/A                                                                                                             |

|                 |                        |                                                                                                       |            |     |                                                                                                                                                                                                                       |                                                                                                                                                |
|-----------------|------------------------|-------------------------------------------------------------------------------------------------------|------------|-----|-----------------------------------------------------------------------------------------------------------------------------------------------------------------------------------------------------------------------|------------------------------------------------------------------------------------------------------------------------------------------------|
|                 |                        | ± 13.4y), 14 controls (7M, 31.1 ± 5.3y)                                                               |            |     | successful completion of a detox program                                                                                                                                                                              |                                                                                                                                                |
|                 | Kaarre et al. [27]     | 27 heavy long-term alcohol use in adolescence (11M, 23-29y), 25 controls (12M, 23-29y)                | CS         | APB | 10y heavy alcohol use from adolescence to young adulthood. No withdrawal symptoms at time of testing.                                                                                                                 | N/A                                                                                                                                            |
|                 | Loheswaran et al. [21] | 15 healthy alcohol drinkers (10M, 33.4 ± 7.5y)                                                        | I (PC, SB) | APB | At least 1 heavy drinking episode (2h period of 5 drinks in males or 4 drinks in females) within the last month. Administered alcoholic beverages until BAC > 17.4mM                                                  | Mean BAC: 23.6 ± 4.1mM                                                                                                                         |
|                 | Quoilin et al. [28]    | 20 alcoholics (9M; 51.1 ± 6.9y), 20 controls (9M; age-matched)                                        | CS         | FDI | Alcoholics: 14.6y of alcohol dependence, mean 19.9 units (1 unit = 10g ethanol) of alcohol per day, abstinent for 17-20 days during assessment                                                                        | N/A                                                                                                                                            |
|                 | Kähkönen et al. [22]   | 10 healthy (all M; 25 ± 3.7y)                                                                         | I          | ADM | 0.8g/kg ethanol                                                                                                                                                                                                       | N/A                                                                                                                                            |
| <i>Cannabis</i> | Fitzgerald et al. [99] | 25 heavy users (20M; 28.6 ± 9.5y), 17 light users (11M; 25.1 ± 6.9y), 19 non-users (13M; 28.9 ± 9.1y) | CS         | APB | Heavy users: used cannabis >7x/week<br>Light users: used cannabis 1-4x/week                                                                                                                                           | All heavy and 6/17 light users had a positive urine test for cannabis. 16/20 heavy users had a quantifiable THC plasma level (2ng/ml at least) |
|                 | Wobrock et al. [101]   | 12 SCZ with comorbid cannabis abuse (10M; 24.4y), 17 SCZ non-users (11M; 33.6y)                       | CS         | FDI | Substance abuse/dependence assessed by the EuropASI and DSM-IV criteria, and defined as cannabis use for >20x in their lifetime, at least weekly consumption over a period of at least 12 weeks in the last 12 months | Negative urine test for alcohol, THC, hallucinogens, and opiates                                                                               |

|                               |                                                                                                                                                                                  |    |     |                                                                                                                                                                                                                                                                                                         |                                                                                                                                                                                              |
|-------------------------------|----------------------------------------------------------------------------------------------------------------------------------------------------------------------------------|----|-----|---------------------------------------------------------------------------------------------------------------------------------------------------------------------------------------------------------------------------------------------------------------------------------------------------------|----------------------------------------------------------------------------------------------------------------------------------------------------------------------------------------------|
| Hasan et al. [98]             | 1 comorbid for TS & ADHD (M, 15y)                                                                                                                                                | I  | FDI | Initial dose of 5mg $\Delta$ -9-THC, then increased to 15mg/day for 9 weeks                                                                                                                                                                                                                             | Blood levels: $\Delta$ -9-THC was <1.0ng/mL, 11-hydroxy- $\delta$ -9-THC was <1.0ng/mL, 11-Nor- $\delta$ -9-THC-9-carbonate was 8.8ng/mL                                                     |
| Flavel et al. [102]           | 26 abstinent stimulant users (17M, 28 $\pm$ 7y), 9 cannabis users (6M; 23 $\pm$ 7y), 17 non-users (9M; 25 $\pm$ 7y)                                                              | CS | FDI | Stimulant users: use of stimulants on >5 occasions (ecstasy, methamphetamine, cocaine, pharmaceuticals)<br>Cannabis users: use of cannabis on >5 occasions                                                                                                                                              | Negative urine test for amphetamines, methamphetamines, ecstasy, cocaine, opioids or benzodiazepines. Participants with positive urine test for THC included if use was >12h before testing. |
| Goodman et al. [103]          | 12 SCZ with comorbid cannabis use (12M; 29.4 $\pm$ 8.4y), 11 SCZ non-users (7M; 38.5 $\pm$ 8.9y), 10 cannabis users (10M; 30.4 $\pm$ 7.4y), 13 non-users (10M; 35.5 $\pm$ 10.5y) | CS | APB | Cannabis dependence: daily use for at least 1y and smokes daily (minimum 5 cigarettes)                                                                                                                                                                                                                  | N/A                                                                                                                                                                                          |
| Martin-Rodriguez et al. [100] | 14 CUD (all M; 23 $\pm$ 3y), 14 daily cannabis users (all M; 24 $\pm$ 3y), 15 controls (all M; 25 $\pm$ 3y)                                                                      | CS | FDI | CUD: 5 $\pm$ 3y of cannabis use (>10x/week), daily cannabis use over previous 6 months, classified as CUD with CUDIT-R score of 13.9 $\pm$ 4<br>Daily users: 6 $\pm$ 3y of cannabis use (>10x/week), daily cannabis use over previous 6 months, classified as non-CUD with CUDIT-R score of 8.5 $\pm$ 4 | Plasma $\Delta$ -9-THC: 5.3-6 ng/mL in daily users, 4.2-6.4 in CUD                                                                                                                           |
| Russo et al. [104]            | 30 MS patients (sex not reported, >18                                                                                                                                            | I  | APB | 1 month of Sativex intake                                                                                                                                                                                                                                                                               | N/A                                                                                                                                                                                          |

|                 |                      |                                                                                                                                                          |             |        |                                                                                                                                                                           |                                                                      |
|-----------------|----------------------|----------------------------------------------------------------------------------------------------------------------------------------------------------|-------------|--------|---------------------------------------------------------------------------------------------------------------------------------------------------------------------------|----------------------------------------------------------------------|
|                 |                      | years, mean age not reported)                                                                                                                            |             |        |                                                                                                                                                                           |                                                                      |
|                 | Leocani et al. [105] | 43 MS patients (23M; 48 ± 8y)                                                                                                                            | I (PC, DB)  | FDI    | 1 month of Sativex intake                                                                                                                                                 | N/A                                                                  |
|                 | Calebro et al. [106] | Group A: 20 MS patients (10M; 52 ± 11y)<br>Group B: 20 MS patients (8M; 47 ± 8y)                                                                         | CS (PC, SB) | TA/APB | Group A: 6 weeks treatment with RAGT and THC:CBD oromucosal spray in addition to normal oral antispastic therapy<br>Group B: 6 weeks of RAGT and oral antispastic therapy | N/A                                                                  |
| <i>Nicotine</i> | Orth et al. [122]    | 9 TS (6M; 2 comorbid for ADHD, 1 comorbid for ADH & OCD, 31.3y), 10 controls (7M; 32.6y)                                                                 | I           | FDI    | Nicotine gum (2mg)                                                                                                                                                        | Plasma nicotine: 4.4 ± 1.3ng/ml in controls and 4.2 ± 1.6ng/ml in TS |
|                 | Lang et al. [130]    | Experiment 1: 12 smokers (10M, 25 ± 0.6y), 12 non-smokers (10M, 24 ± 0.7y)<br>Experiment 2: 19 smokers (13M, 24 ± 0.4y), 19 non-smokers (13M, 24 ± 0.4y) | CS          | APB    | Smokers: minimum 10 cigarettes/day for 4y (Fagerström score of 2.92 ± 0.4 in experiment 1, 3.19 ± 0.24 in experiment 2)                                                   | N/A                                                                  |
|                 | Grundey et al. [123] | 12 smokers (8M; 26 ± 4y), 12 non-smokers (6M; 25 ± 4y)                                                                                                   | I           | ADM    | Smokers: minimum 10 cigarettes/day for 4y<br>Nicotine transdermal patch (16mg over 6h)                                                                                    | N/A                                                                  |
|                 | Khedr et al. [131]   | 25 smokers (all M, 39.6 ± 15.1y), 25 non-smokers (all M, 42.2 ± 13.5y)                                                                                   | CS          | FDI    | Smokers: minimum 10 cigarettes/day for 3y                                                                                                                                 | N/A                                                                  |

|                 |                          |                                                                                         |            |        |                                                                                                                                                                                                                   |                                                                                                        |
|-----------------|--------------------------|-----------------------------------------------------------------------------------------|------------|--------|-------------------------------------------------------------------------------------------------------------------------------------------------------------------------------------------------------------------|--------------------------------------------------------------------------------------------------------|
| <i>Caffeine</i> | Kalmar et al. [153]      | 7 healthy (all M; 25 ± 5y)                                                              | I (PC, DB) | FDI    | All participants self-reported caffeine intake <250 mg/week (low consumption)<br>Caffeine capsule (6mg/kg)                                                                                                        | N/A                                                                                                    |
|                 | Orth et al. [148]        | 11 healthy (7M; 32.9y, range 24–38)                                                     | I (PC, DB) | FDI    | Decaf coffee with added 3mg/kg caffeine                                                                                                                                                                           | Plasma caffeine: 0.95 ± 0.48µg/ml at 60min and 0.7 ± 0.36µg/ml at 120min                               |
|                 | Specterman et al. [157]  | 10 healthy (5M; 21-50y); 6 in Lucozade trials; 4 in control trials                      | I (PC)     | Thenar | Lucozade trials: Lucozade, a sports drink containing 380ml water, 68g glucose and 46mg caffeine<br>Control trials: 380ml water, 380ml water with 68g glucose, or 380ml water with 46mg caffeine (over 3 sessions) | N/A                                                                                                    |
|                 | Cerqueira et al. [150]   | Experiment A: 18 healthy (9M; 28.4 ± 4.8y)<br>Experiment B: 6 healthy (4M; 28.8 ± 8.8y) | I (PC, DB) | ADM    | Experiment A: 200mg caffeine capsule<br>Experiment B: 400mg caffeine capsule                                                                                                                                      | Plasma caffeine: 3.85 ± 0.09µg/ml at 60min in experiment A, 10.41 ± 1.67µg/ml at 60min in experiment B |
|                 | de Carvalho et al. [151] | 13 healthy (3M; 27.5 ± 3.3y)                                                            | I (PC, DB) | ADM    | 200mg of caffeine                                                                                                                                                                                                 | N/A                                                                                                    |
|                 | Concerto et al. [152]    | 14 healthy (6M; 31.2 ± 9y)                                                              | I (PC, DB) | APB    | Sugar-free energy drink with 2mg/kg caffeine                                                                                                                                                                      | N/A                                                                                                    |
|                 | Mesquita et al. [149]    | 18 healthy (all M; 26.6 ± 3.1y)                                                         | I (PC, DB) | SOL    | Caffeine capsule (6mg/kg)                                                                                                                                                                                         | 8.51mg/L 60min after intake, 7.04mg/L after fatigue protocol                                           |
|                 | Hanajima et al. [154]    | 12 healthy (6M; 44.8 ± 1.4y)                                                            | I (PC, DB) | FDI    | 200mg of caffeine                                                                                                                                                                                                 | N/A                                                                                                    |
|                 | Kalmar et al. [155]      | 8 healthy (all M; 22.5 ± 1.9y)                                                          | I (PC, DB) | VL     | Caffeine capsule (6mg/kg)                                                                                                                                                                                         | N/A                                                                                                    |
|                 | Bowtell et al. [156]     | 9 recreational athletes (all M; 26 ± 2.7y)                                              | I (PC, DB) | VM     | Caffeine capsule (6mg/kg)                                                                                                                                                                                         | N/A                                                                                                    |

ADHD: Attention-Deficit Hyperactive Disorder, ADM: abductor digiti minimi, APB: abductor pollicis brevis, AWS: alcohol-withdrawal syndrome, BAC: blood alcohol concentration, CBD: cannabidiol, CS: cross-sectional, CUD: cannabis use disorder, CUDIT-R: Cannabis Use Disorder Identification Test-Revised, DB: double-blind, ECR: extensor carpi radialis, FDI: first dorsal interosseous, I: intervention, MS: multiple sclerosis, N/A: not available, OP: opponens pollicis, PC: placebo-controlled, RAGT: robot-aided gait training, SB: single-blinded, SCZ: Schizophrenia, SOL: soleus, TAL: tibialis anterior, THC: delta-9-tetrahydrocannabinol, TS: Tourette's Syndrome, VL: vastus lateralis, VM: vastus medialis.
